# Supplementary material for: Synthesis of crystalline WS3 with a layered structure and desert-rose-like morphology
Source: Royal Society of Chemistry journal article supplement (doi:10.1039/d1na00558h), 2022-01-01
Supplement: d1na00558h1.pdf [file d1na00558h1.pdf]

## Supporting Information

### Synthesis of crystalline WS<sub>3</sub> with layered structure and desert-rose-like morphology

Zeyao Zhang,<sup>a, c</sup> Yi Qiu,<sup>a</sup> Wenqing Yan,<sup>a, b</sup> Zhengyang Zhou,<sup>a</sup> Yixi Yao,<sup>a, b</sup> Xiyao Liu,<sup>a</sup> Junliang Sun,<sup>a</sup> and Yan Li\*<sup>a, b, c</sup>

- Beijing National Laboratory for Molecular Science, State Key Laboratory of Rare Earth Materials Chemistry and Applications, College of Chemistry and Molecular Engineering, Peking University, Beijing, 100871, China.
- Academy for Advanced Interdisciplinary Studies, Peking University, Beijing 100871, China.
- PKU-HKUST ShenZhen-HongKong Institution, Shenzhen, 518057, China

\*Corresponding Author. E-mail: yanli@pku.edu.cn

#### Discussion on determining the composition of WS<sub>3</sub> sample

Inductively-coupled-plasma-based quantitative analysis methods, for example, inductively coupled plasma optical emission spectrometry (ICP-OES), are very useful tools for analysis of composition because of their good accuracy. However, Proper digestion method is crucial for accurate analysis of solid samples. The main issue for our WS<sub>3</sub> sample is the digestion of S anions. Because of the volatile species of S, such as H<sub>2</sub>S and SO<sub>x</sub>, digestion based on closed vessels is necessary. Teflon vessel is not recommended for digestion of S because it may cause loss of S analyte.<sup>1</sup> Therefore, specially designed high-pressure quartz vessels were employed in some papers for accurate digestion of S, either using high pressure asher<sup>2</sup> or microwave digestion system.<sup>3</sup>

Unfortunately, we did not have access to the high-pressure quartz vessel. So, we tried autoclave with Teflon vessel for digestion of our WS<sub>3</sub> sample. We took two fractions from the very same WS<sub>3</sub> sample for digestion and measured the concentration of W and S with ICP-OES. The S/W ratios were  $2.44 \pm 0.04$  for one fraction and  $2.06 \pm 0.08$  for another. The large inconsistency indicates a significant loss of S during the digestion and thus an underestimation of the S/W ratio. Therefore, the results of our ICP-OES measurements were not able to reflect the real composition of the WS<sub>3</sub> sample and were not included in the manuscript.

In order to determine the composition of WS<sub>3</sub> as best we can, we carried out not only the

XPS analysis but also the thermogravimetric experiments, as discussed in the manuscript.

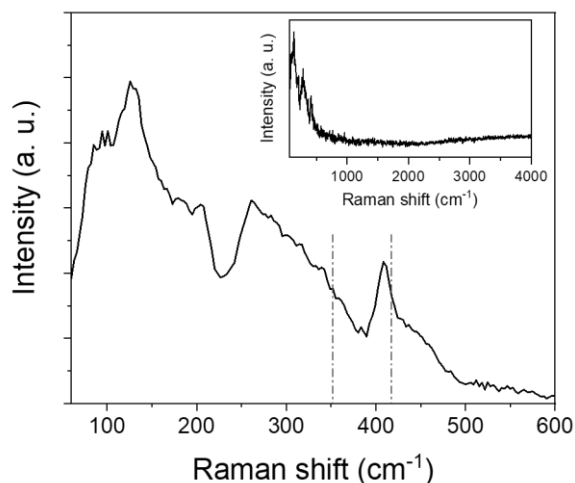

**Figure S1.** Raman spectra of the WS<sub>3</sub> sample (excitation laser wavelength: 532 nm). The two dashed line mark the positions of the two typical peaks of WS<sub>2</sub>. The full spectrum from 50 to 4000 cm<sup>-1</sup> is shown in the inset, where no peak is found beyond 600 cm<sup>-1</sup>. The Raman bands of the WS<sub>3</sub> are totally different from the WS<sub>2</sub>.

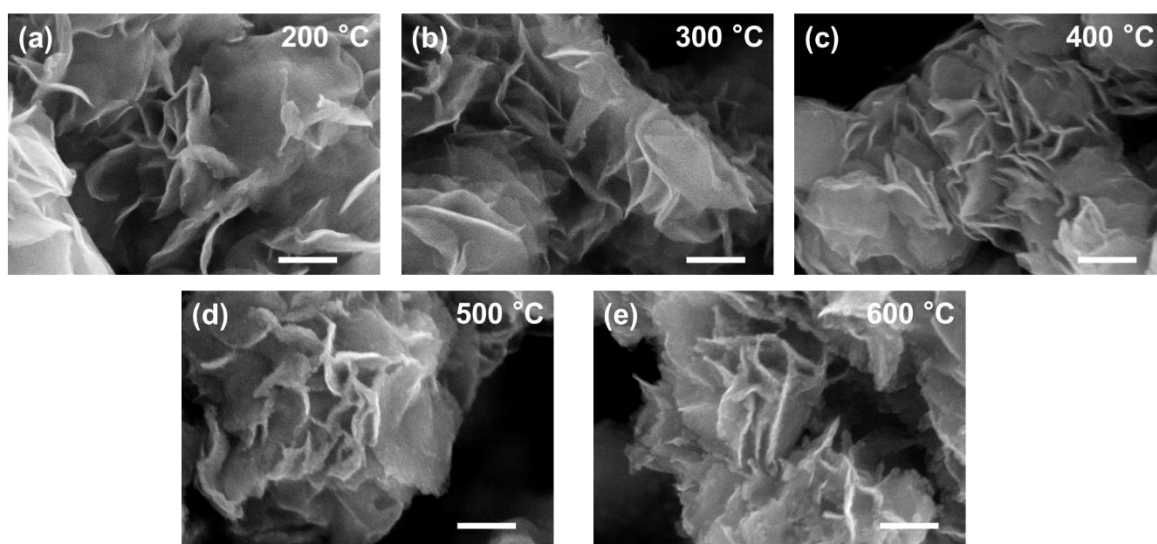

**Figure S2.** Scanning electron microscopy images of annealed WS<sub>3</sub> at different. The annealing temperatures are 200 °C (a), 300 °C (b), 400 °C (c), 500 °C (d), and 600 °C (e), respectively. The scale bar is 200 nm.

**Table S1.** Activities of tungsten sulphides as electrochemical catalyst for HER.

|                                        | Preparation method                                                                            | Overpotential (mV)          | Tafel slope (mV/dec)  | Ref.      |
|----------------------------------------|-----------------------------------------------------------------------------------------------|-----------------------------|-----------------------|-----------|
| <b>WS<sub>3</sub></b>                  | Sulphurization of WO <sub>3</sub> ·0.33H <sub>2</sub> O with thioacetamide in DMF             | 130                         | 86                    | This work |
| <b>WS<sub>2.64</sub></b>               | Electrodeposition from (NH <sub>4</sub> ) <sub>2</sub> WS <sub>4</sub> solution               | ~ 390                       | 43.7                  | [4]       |
| <b>WS<sub>2</sub></b>                  | Sulphurization of WCl <sub>6</sub> with S in oleylamine                                       | ~100                        | 48                    | [5]       |
| <b>WS<sub>2</sub></b>                  | Reaction of WO <sub>3</sub> with S at 830 ° C on Au foil                                      | 110                         | 100                   | [6]       |
| <b>WS<sub>2</sub></b>                  | CVD reaction of W foil and S                                                                  | ~100                        | 54                    | [7]       |
| <b>WS<sub>2</sub> (both 1T and 2H)</b> | Lithium intercalation and exfoliation from bulk WS <sub>2</sub>                               | 80–100 (1T)<br>150–200 (2H) | ~60 (1T)<br>~115 (2H) | [8]       |
| <b>WS<sub>2</sub> (1T)</b>             | Microwave-assisted intercalation and exfoliation from CVD-grown WS <sub>2</sub>               | ~75                         | 70                    | [9]       |
| <b>WS<sub>2</sub> (1T)</b>             | Surfactant-Assisted Exfoliation from bulk WS <sub>2</sub>                                     | 90                          | 51                    | [10]      |
| <b>WS<sub>2</sub> (mainly 1T')</b>     | Sulphurization of (NH <sub>4</sub> ) <sub>2</sub> WO <sub>4</sub> with thiourea in oleylamine | ~120                        | 50.4                  | [11]      |
| <b>WS<sub>2</sub>/rGO</b>              | Hydrothermal reaction of WCl <sub>6</sub> , thioacetamide, and graphene oxide                 | 150-200                     | 58                    | [12]      |

## References

1. J. Heilmann, S. F. Boulyga and K. G. Heumann, *Analytical and Bioanalytical Chemistry*, 2004, **380**, 190-197.
2. M. Ostermann, M. Berglund and P. D. P. Taylor, *J. Anal. At. Spectrom.*, 2002, **17**, 1368-1372.
3. P. Evans, C. Wolff-Briche and B. Fairman, *J. Anal. At. Spectrom.*, 2001, **16**, 964-969.
4. S. M. Tan and M. Pumera, *ACS Appl. Mater. Interfaces*, 2016, **8**, 3948-3957.
5. L. Cheng, W. Huang, Q. Gong, C. Liu, Z. Liu, Y. Li and H. Dai, *Angew. Chem. Int. Ed.*, 2014, **53**, 7860-7863.
6. Y. Zhang, J. Shi, G. Han, M. Li, Q. Ji, D. Ma, Y. Zhang, C. Li, X. Lang, Y. Zhang and Z.

Liu, *Nano Res.*, 2015, **8**, 2881-2890.

7. M. Wang, L. Zhang, M. Huang, Q. Zhang, X. Zhao, Y. He, S. Lin, J. Pan and H. Zhu, *J. Mater. Chem. A*, 2019, **7**, 22405-22411.

8. M. Chhowalla, H. S. Shin, G. Eda, L.-J. Li, K. P. Loh and H. Zhang, *Nat. Chem.*, 2013, **5**, 263-275.

9. M. A. Lukowski, A. S. Daniel, C. R. English, F. Meng, A. Forticaux, R. J. Hamers and S. Jin, *Energy Environ. Sci.*, 2014, **7**, 2608-2613.

10. X. Zhao, X. Ma, J. Sun, D. Li and X. Yang, *ACS nano*, 2016, **10**, 2159-2166.

11. Z. Liu, N. Li, C. Su, H. Zhao, L. Xu, Z. Yin, J. Li and Y. Du, *Nano Energy*, 2018, **50**, 176-181.

12. J. Yang, D. Voiry, S. J. Ahn, D. Kang, A. Y. Kim, M. Chhowalla and H. S. Shin, *Angew. Chem. Int. Ed.*, 2013, **52**, 13751-13754.
